# Supplementary material for: Modelling the Heating Process at Transient and Steady State of an In Situ Tape Laying Machine Head
Source: Preprints.org preprint supplement (doi:10.20944/preprints202109.0363.v1), 2021-09-21

5mm/s (Measuring point)      10mm/s (Measuring point)      15mm/s (Measuring point)  
5mm/s (Nip Point)      10mm/s (Nip Point)      15mm/s (Nip Point)

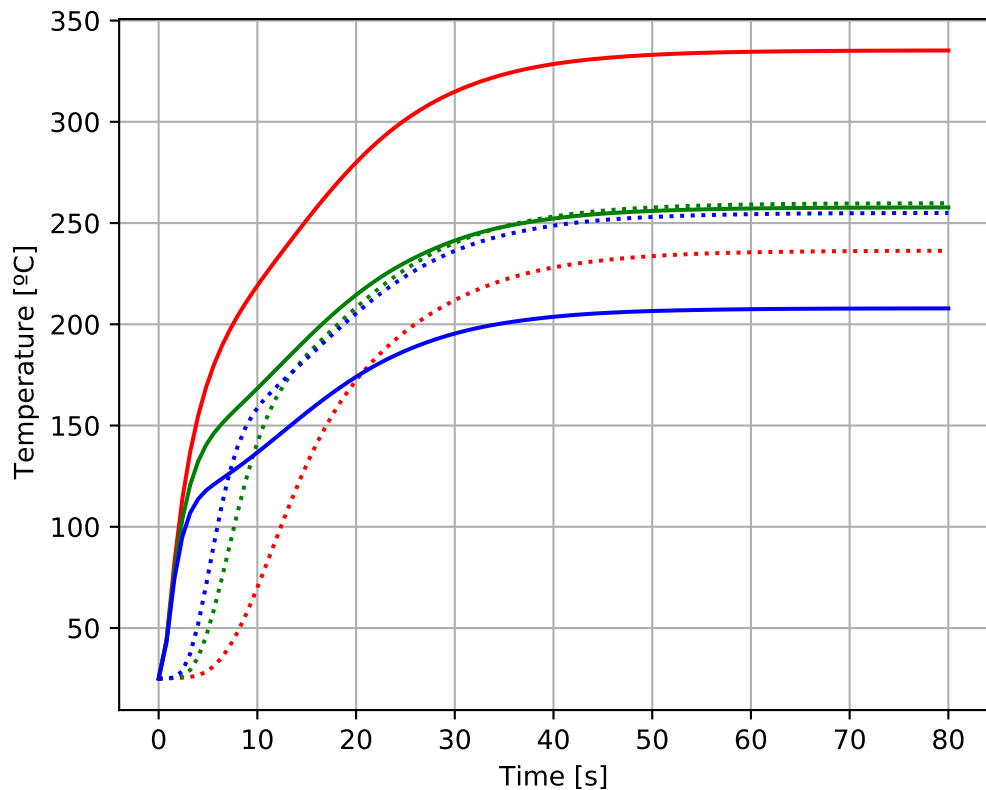

Supplement: Supplementary file 4 [file supplementary]
