# Supplementary figures and images for: Modelling the Heating Process at Transient and Steady State of an In Situ Tape Laying Machine Head
Source: Preprints.org preprint supplement (doi:10.20944/preprints202109.0363.v1), 2021-09-21

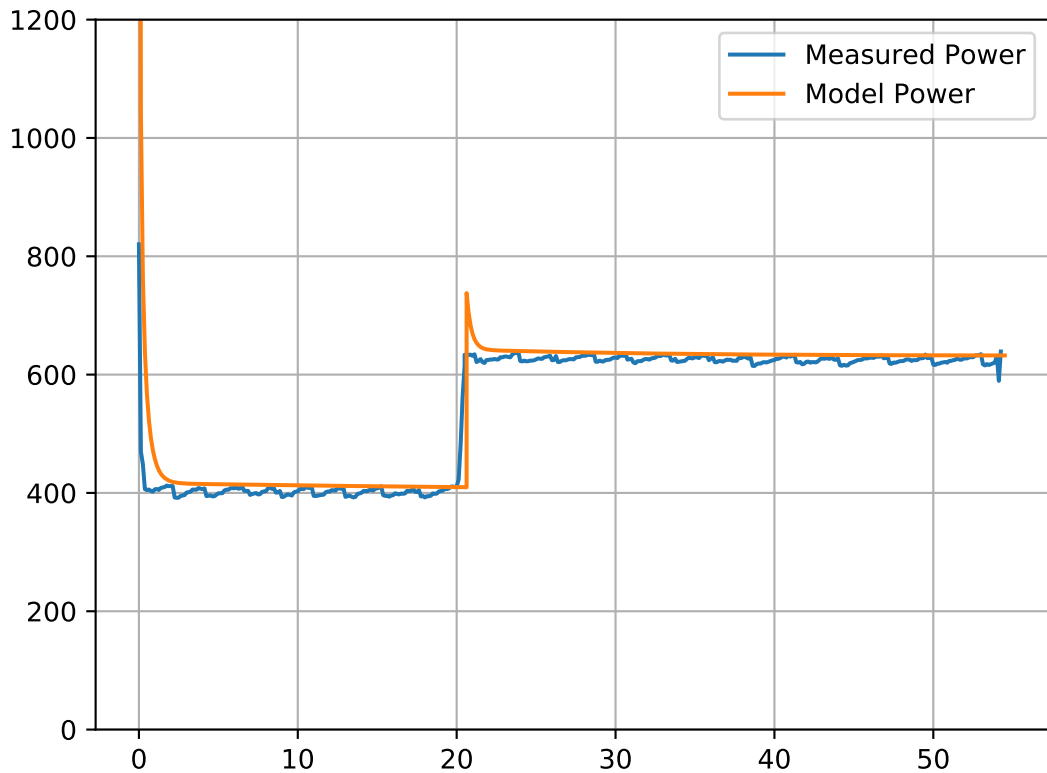

Supplement: Supplementary file 1 [file supplementary]

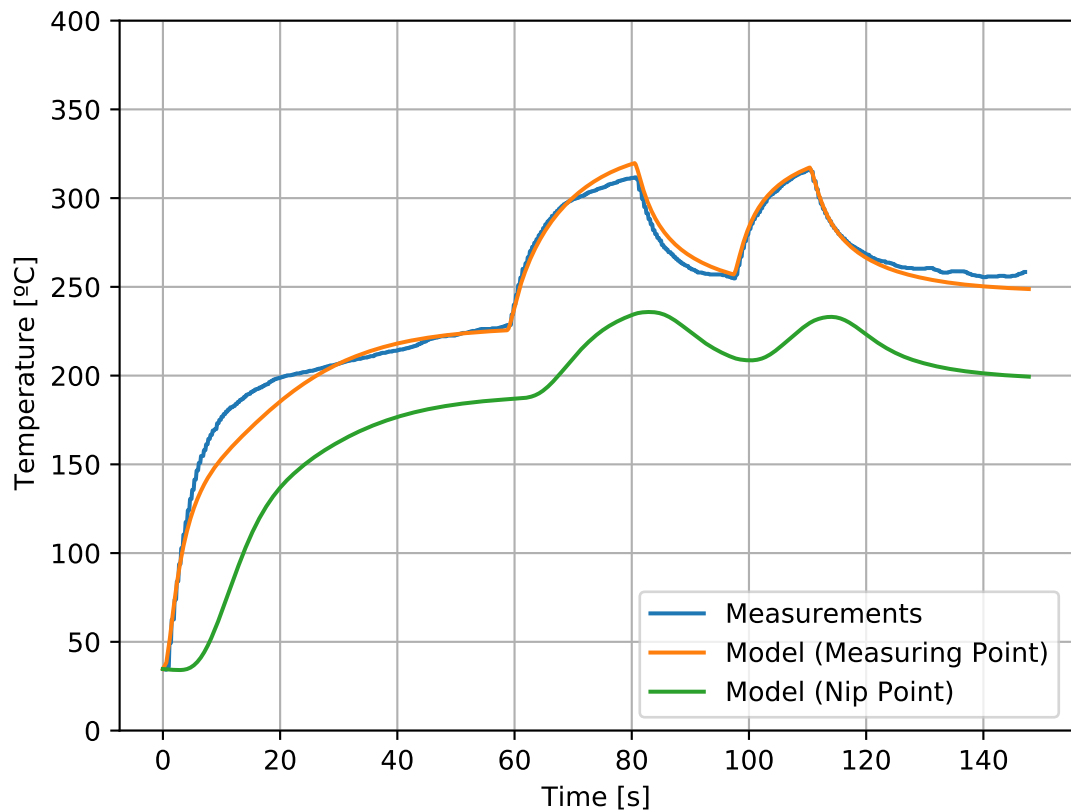

Supplement: Supplementary file 2 [file supplementary]

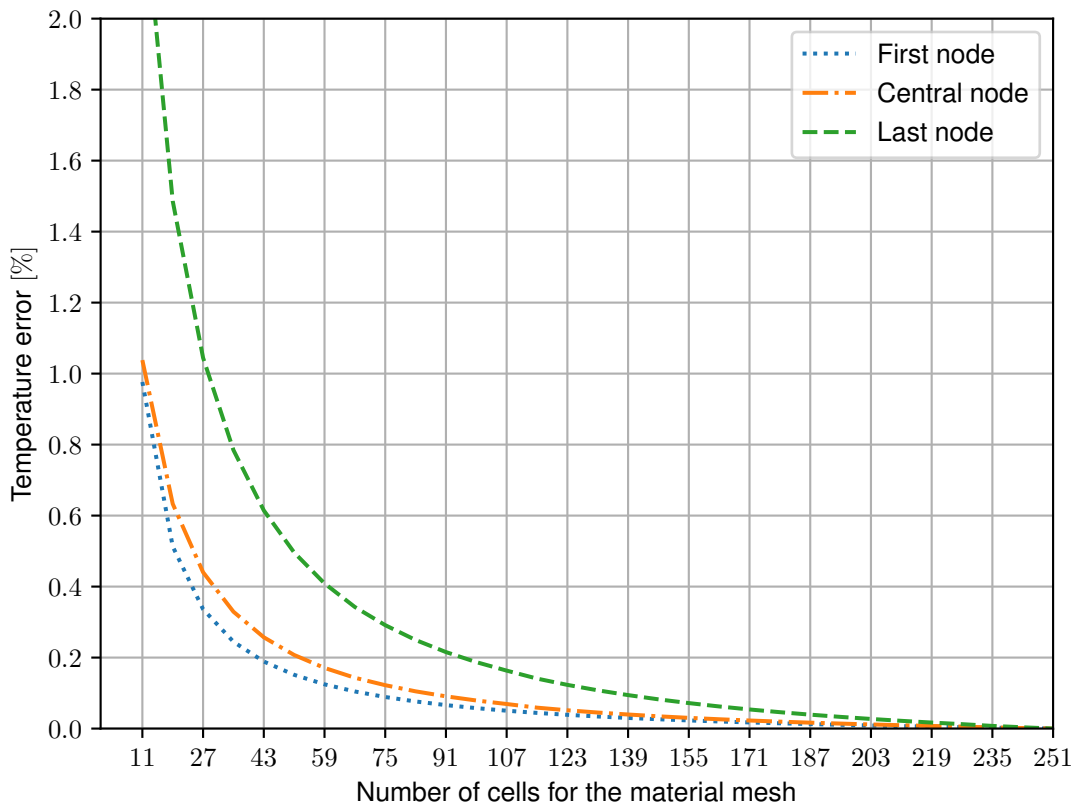

Supplement: Supplementary file 3 [file supplementary]

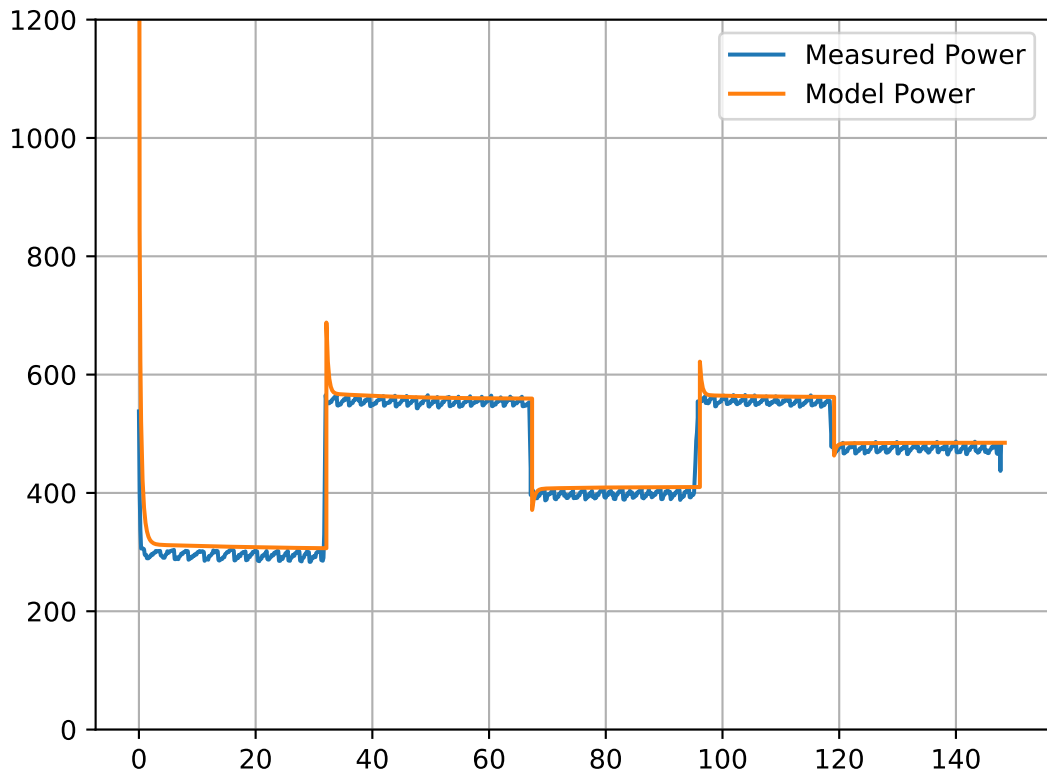

Supplement: Supplementary file 5 [file supplementary]

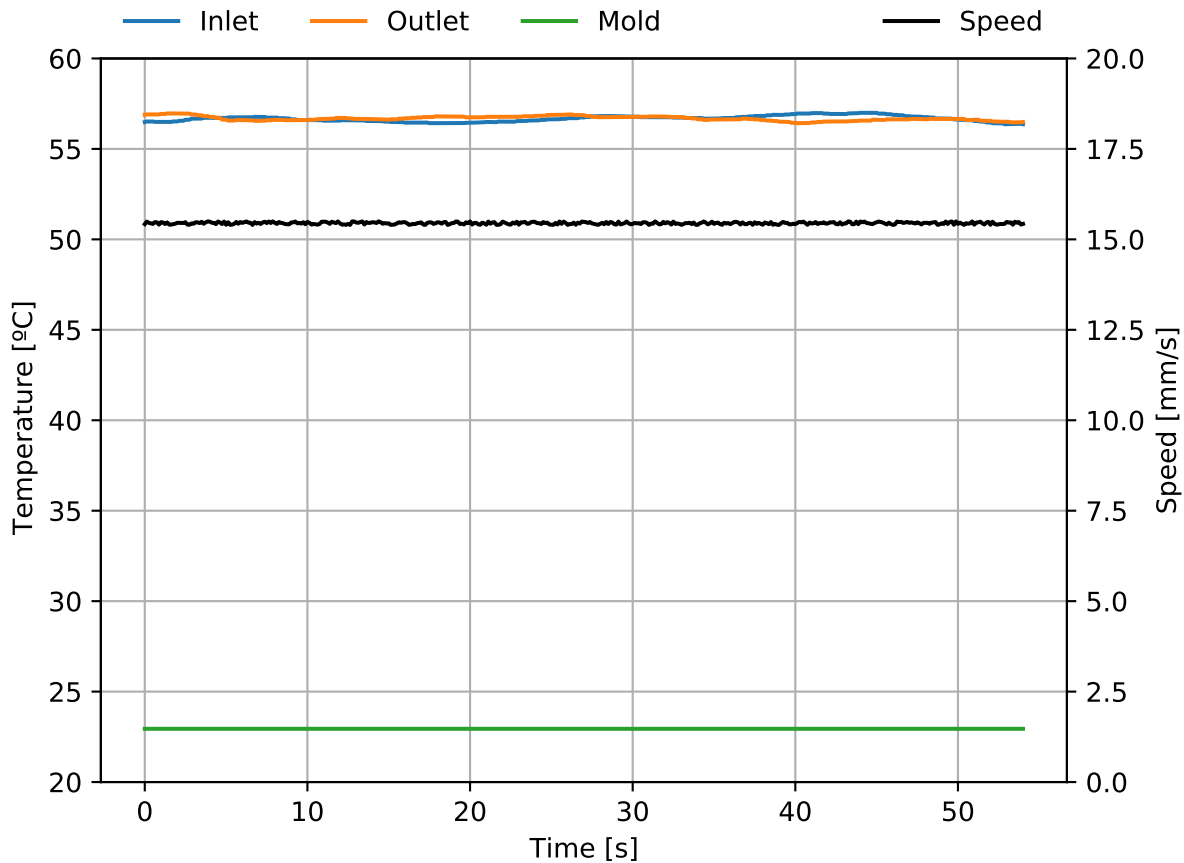

Supplement: Supplementary file 6 [file supplementary]

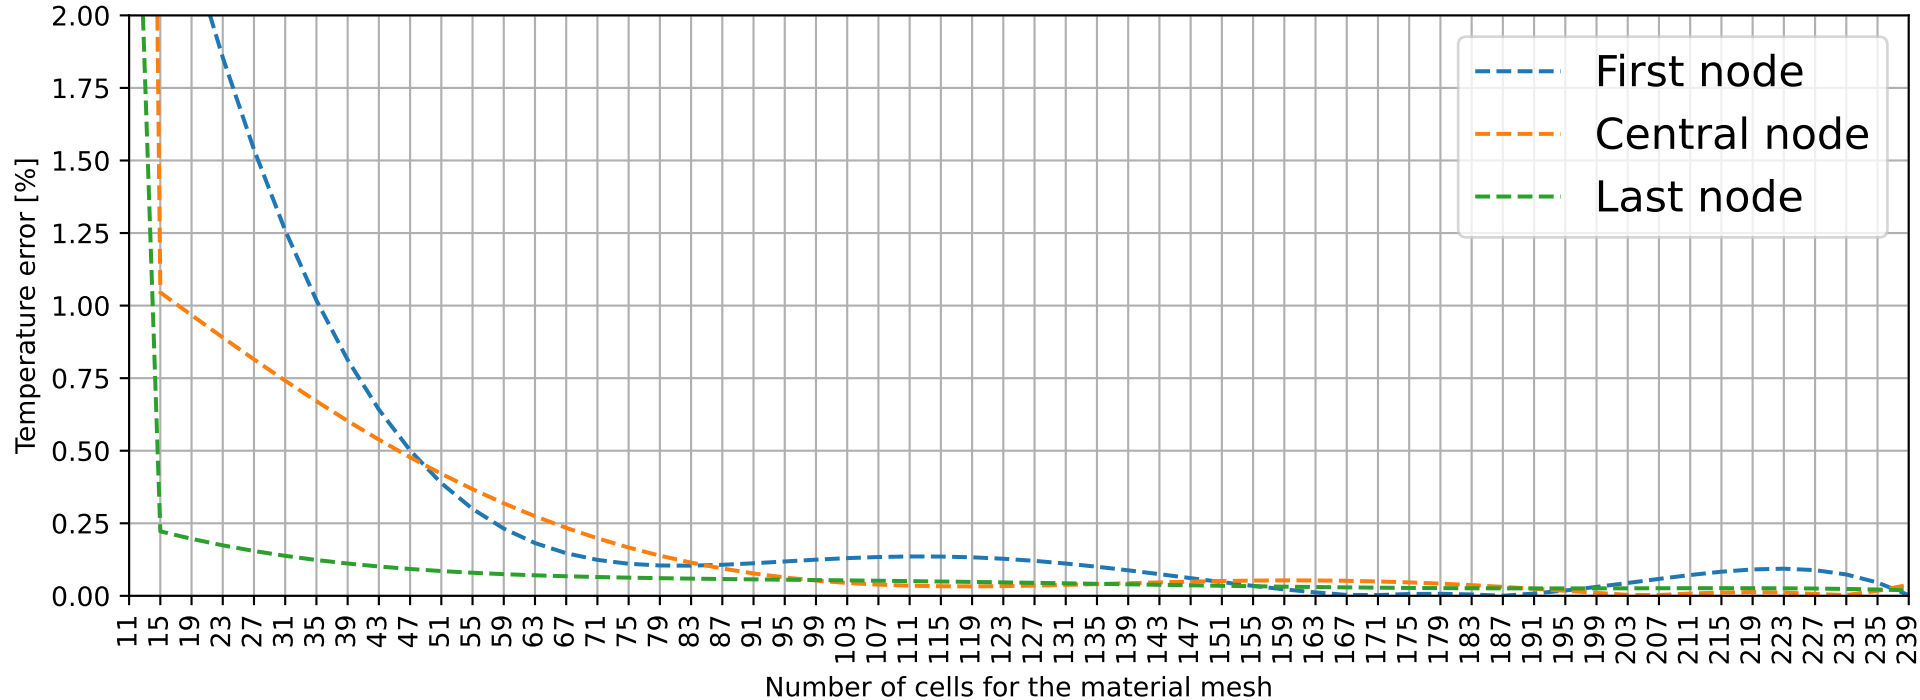

Supplement: Supplementary file 7 [file supplementary]

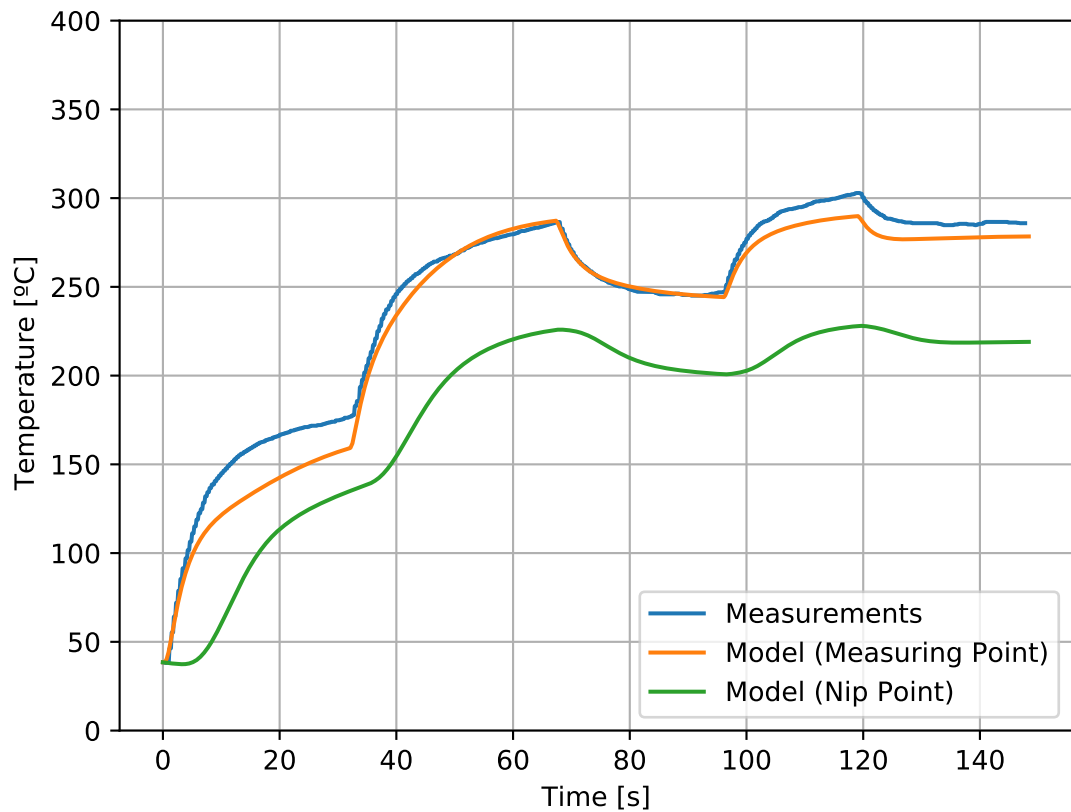

Supplement: Supplementary file 8 [file supplementary]

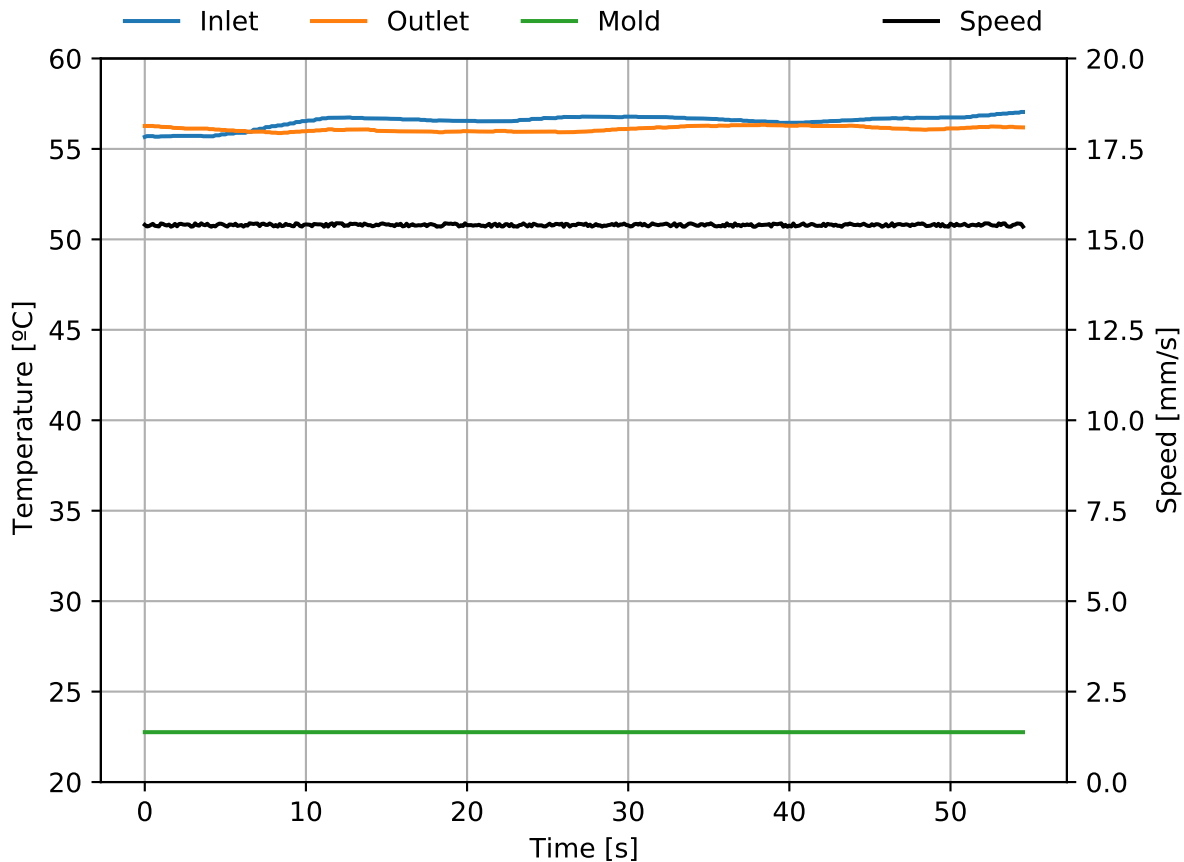

Supplement: Supplementary file 9 [file supplementary]

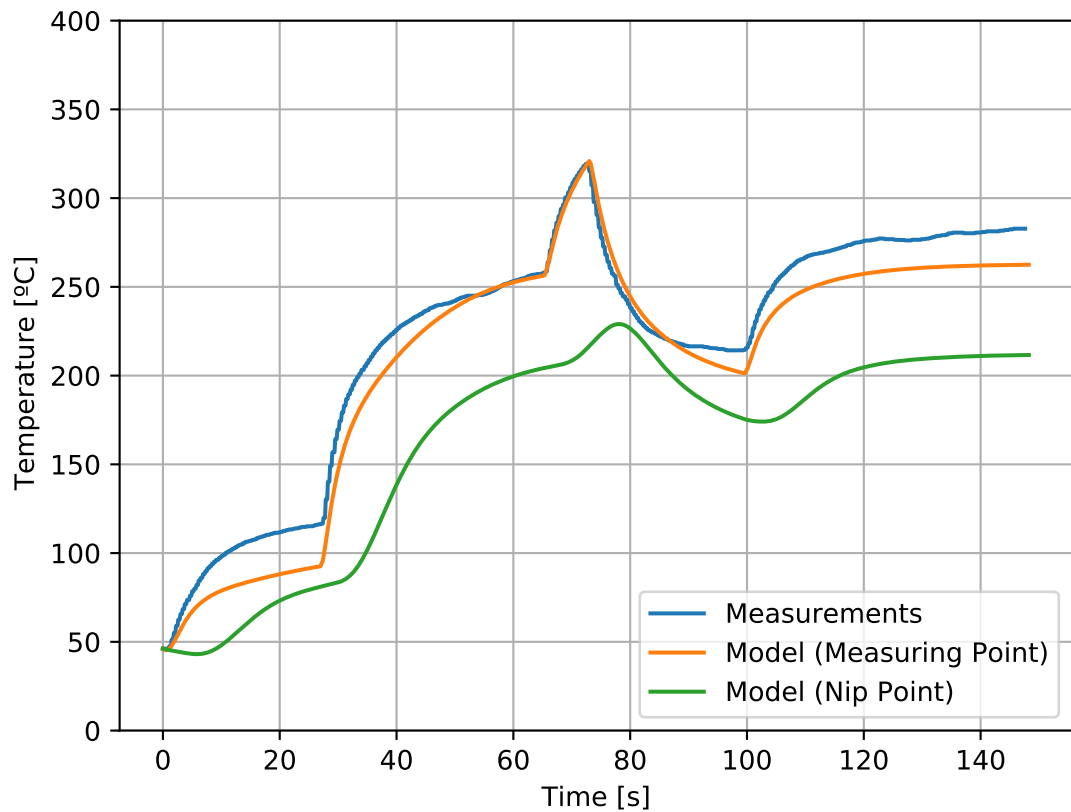

Supplement: Supplementary file 10 [file supplementary]

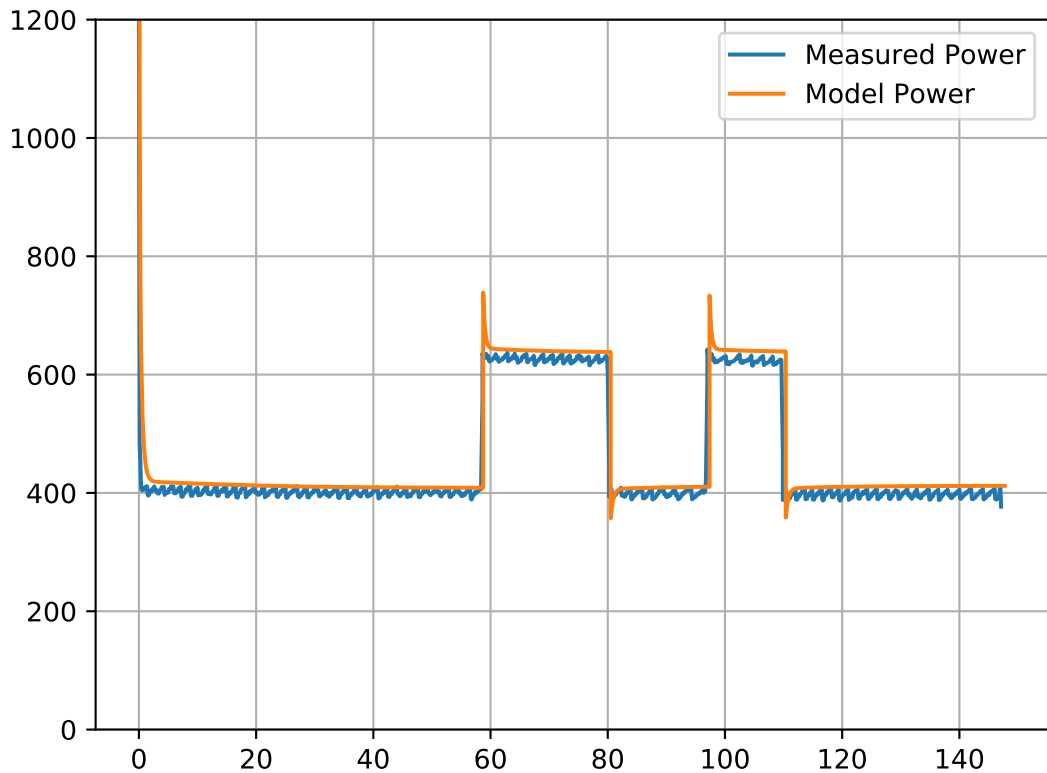

Supplement: Supplementary file 11 [file supplementary]

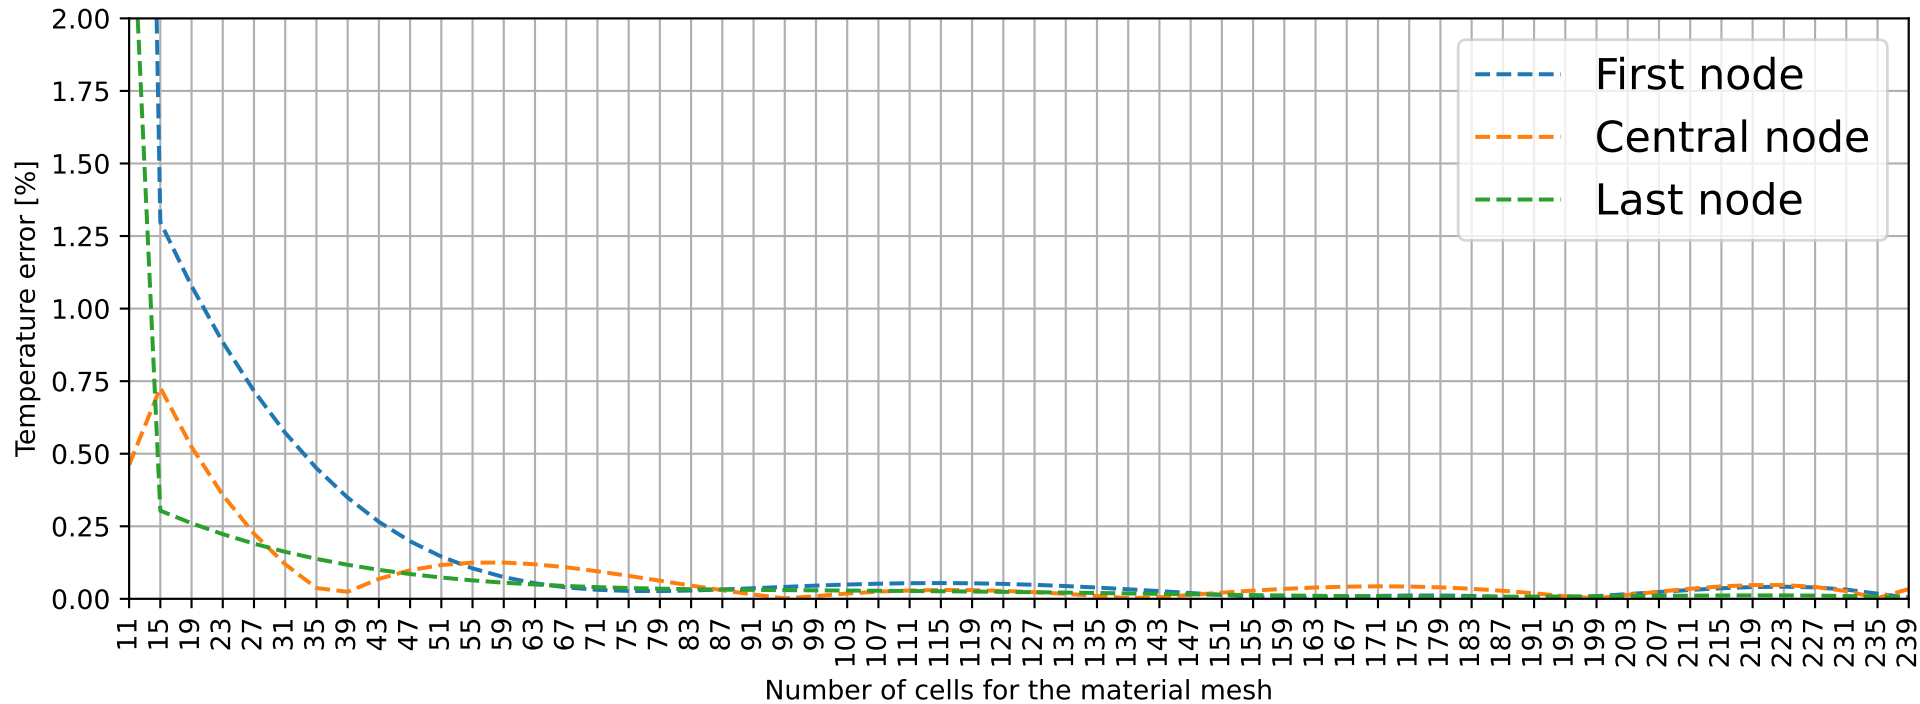

Supplement: Supplementary file 12 [file supplementary]

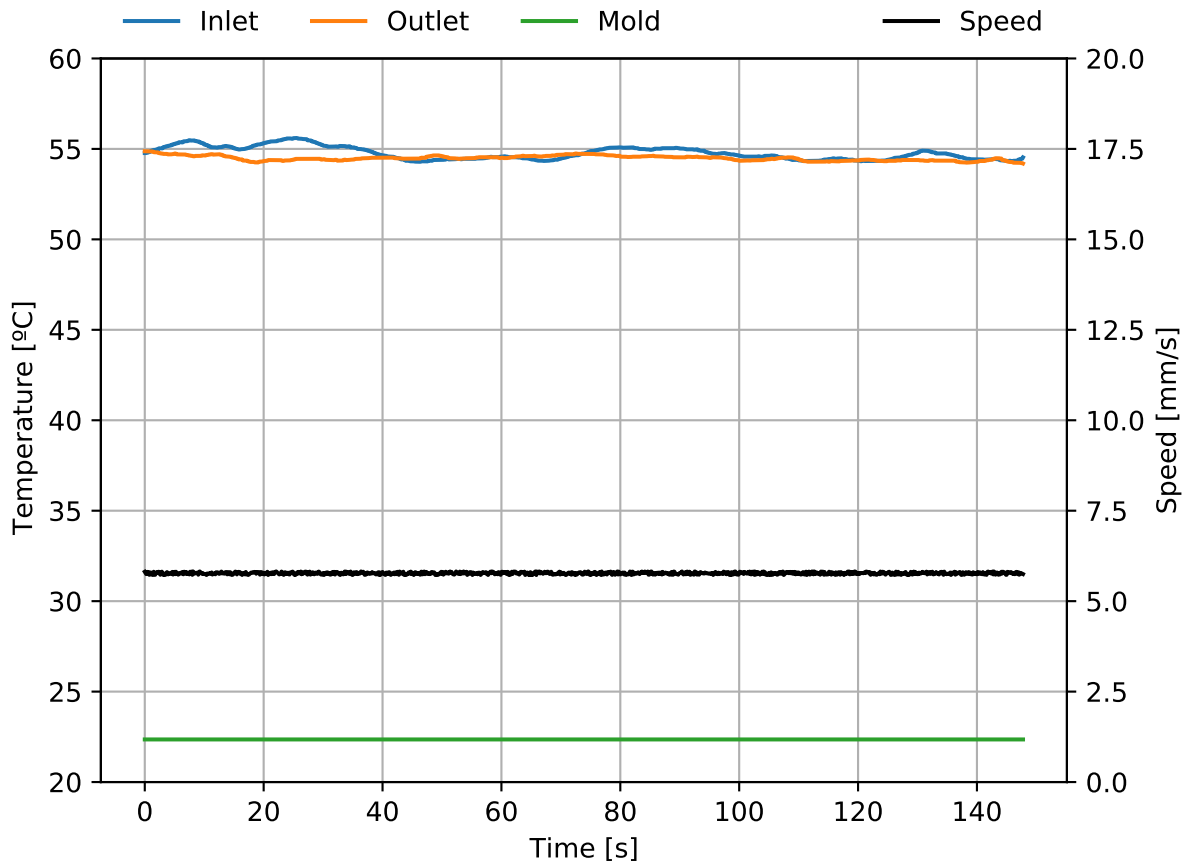

Supplement: Supplementary file 13 [file supplementary]

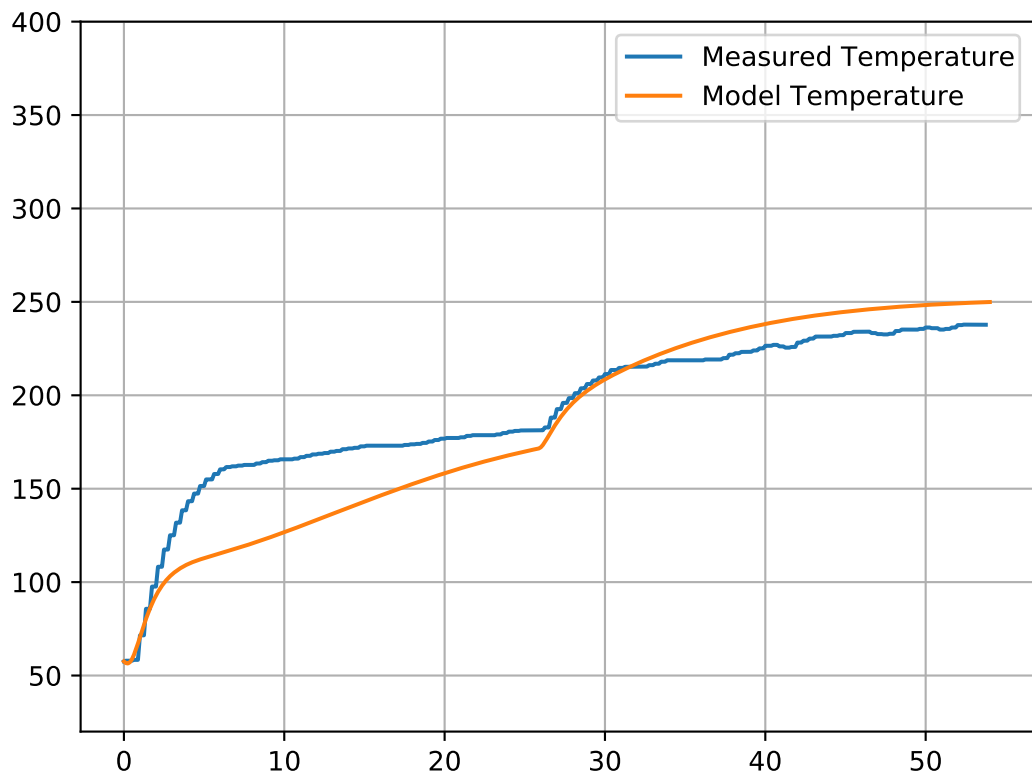

Supplement: Supplementary file 14 [file supplementary]

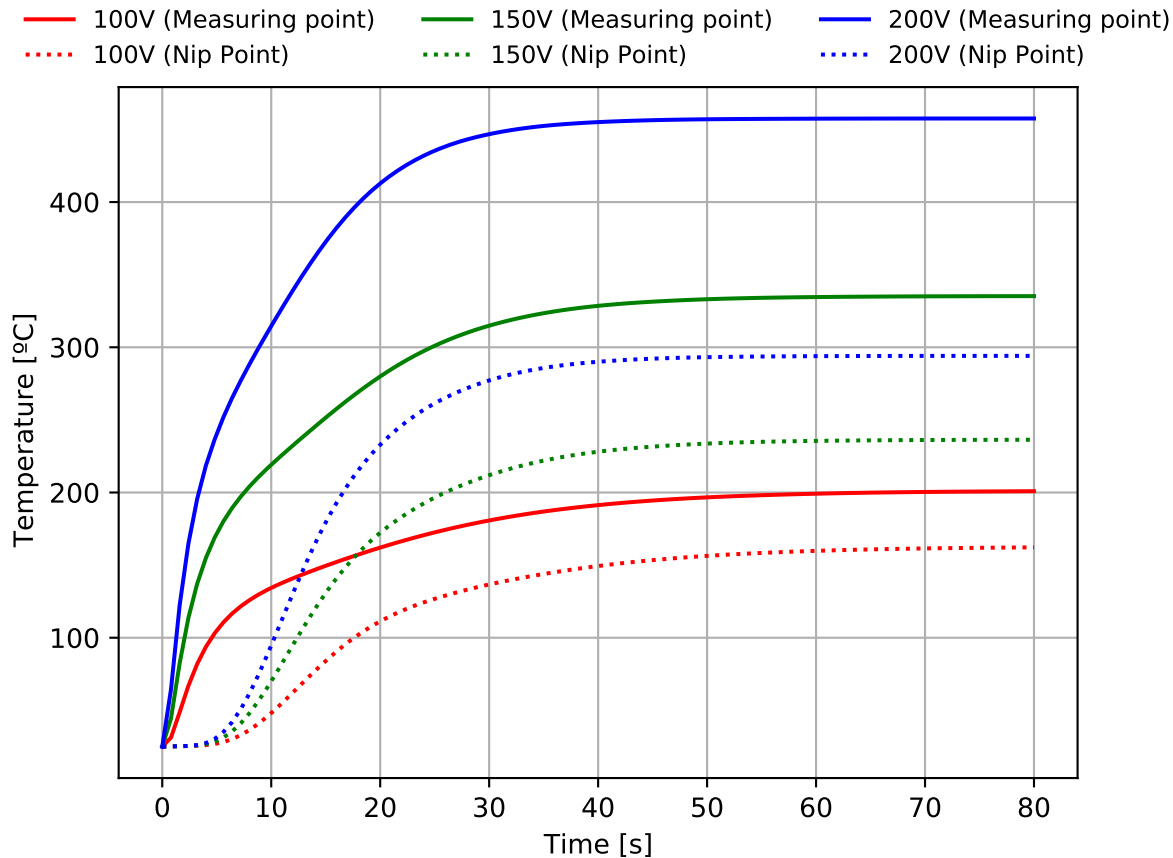

Supplement: Supplementary file 15 [file supplementary]

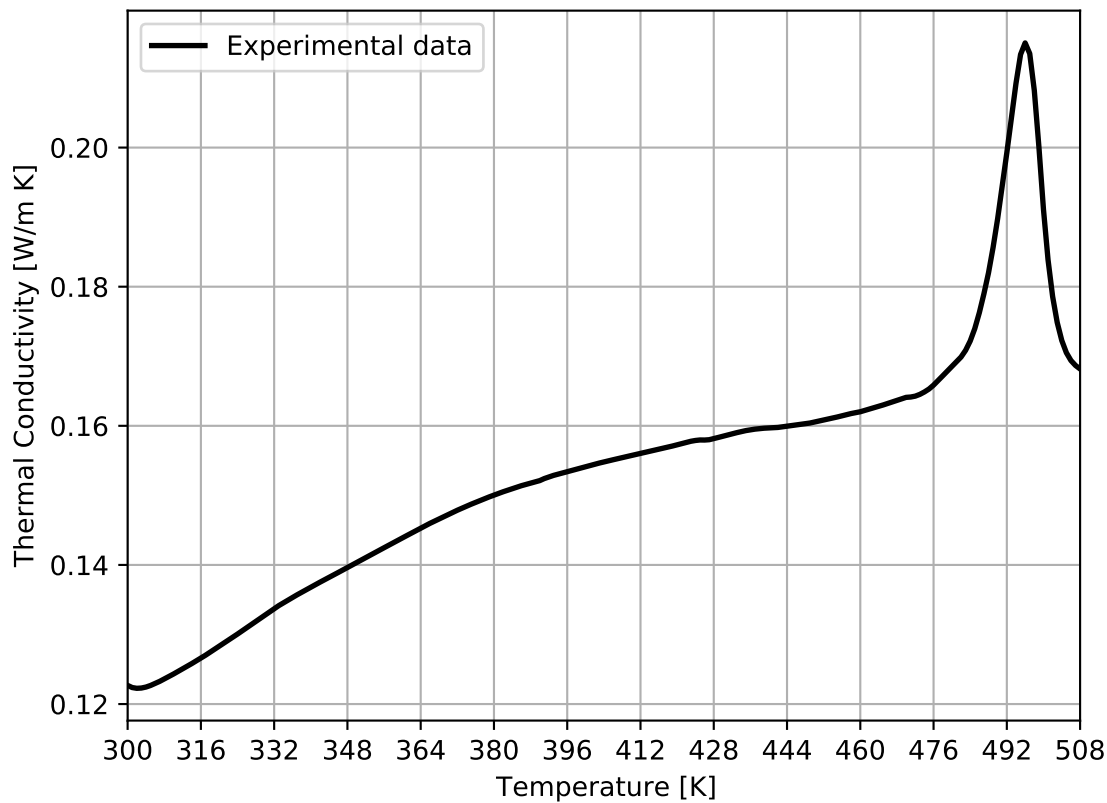

Supplement: Supplementary file 16 [file supplementary]

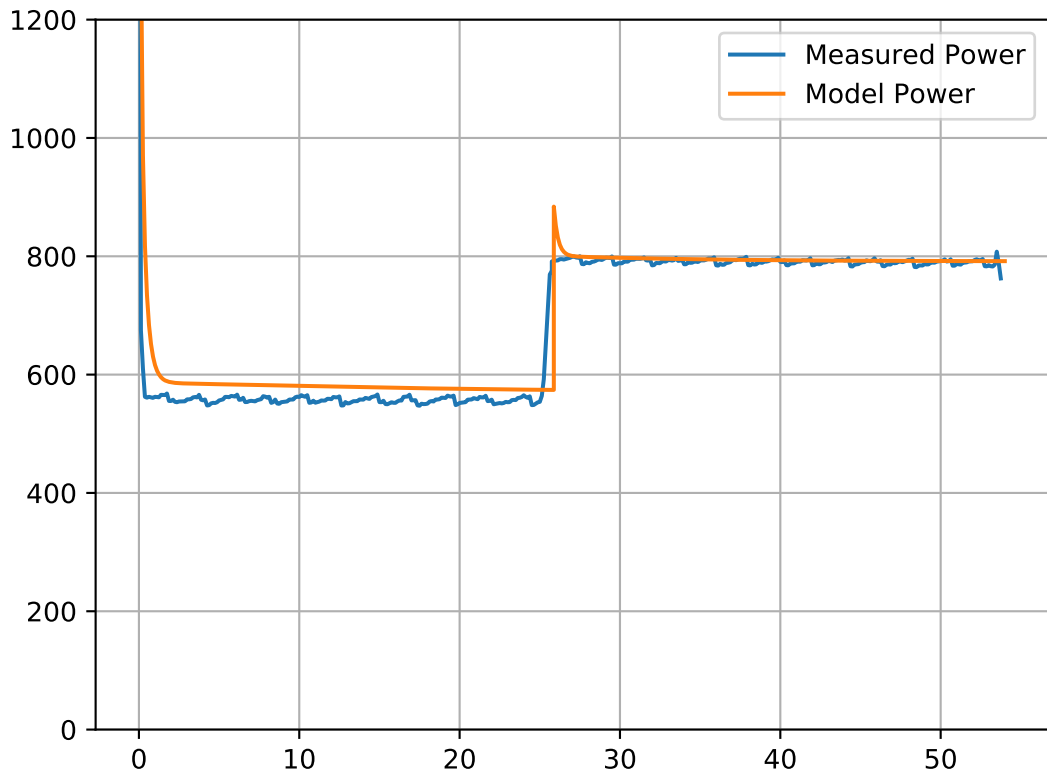

Supplement: Supplementary file 17 [file supplementary]

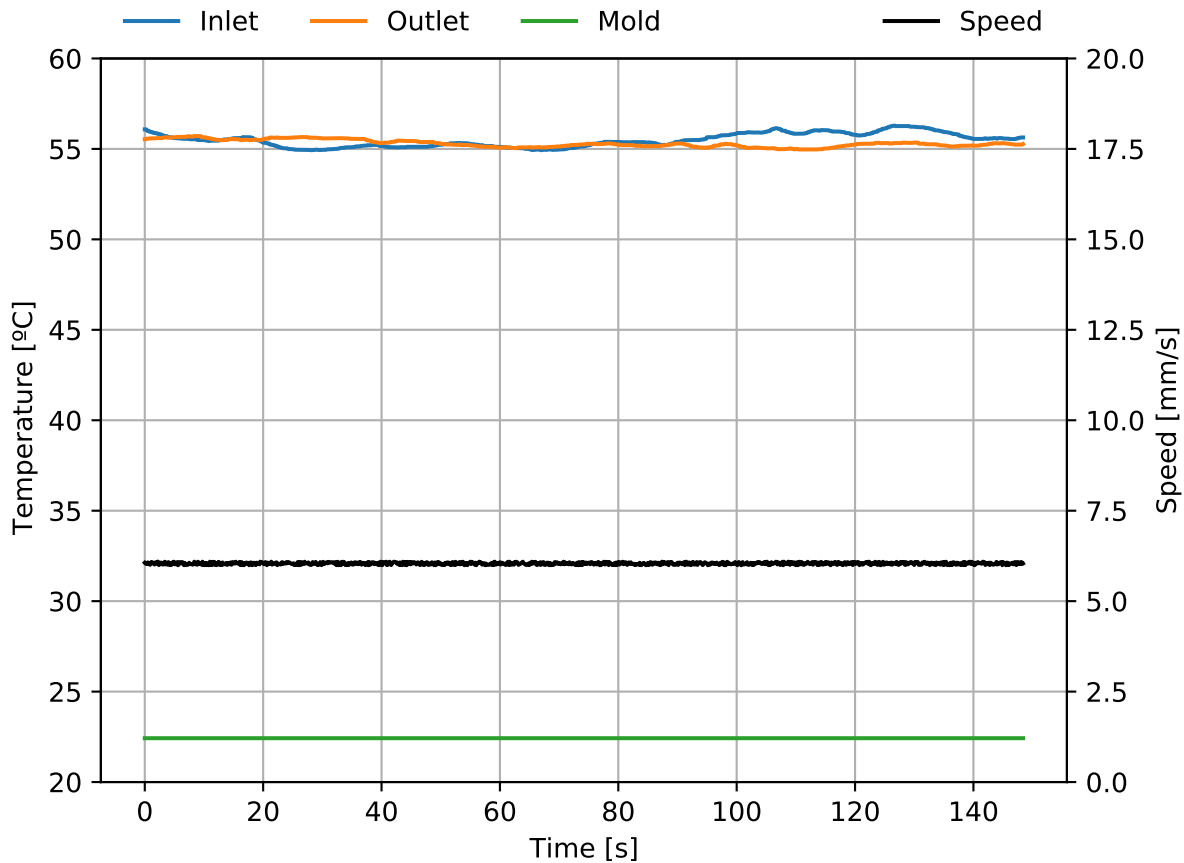

Supplement: Supplementary file 18 [file supplementary]

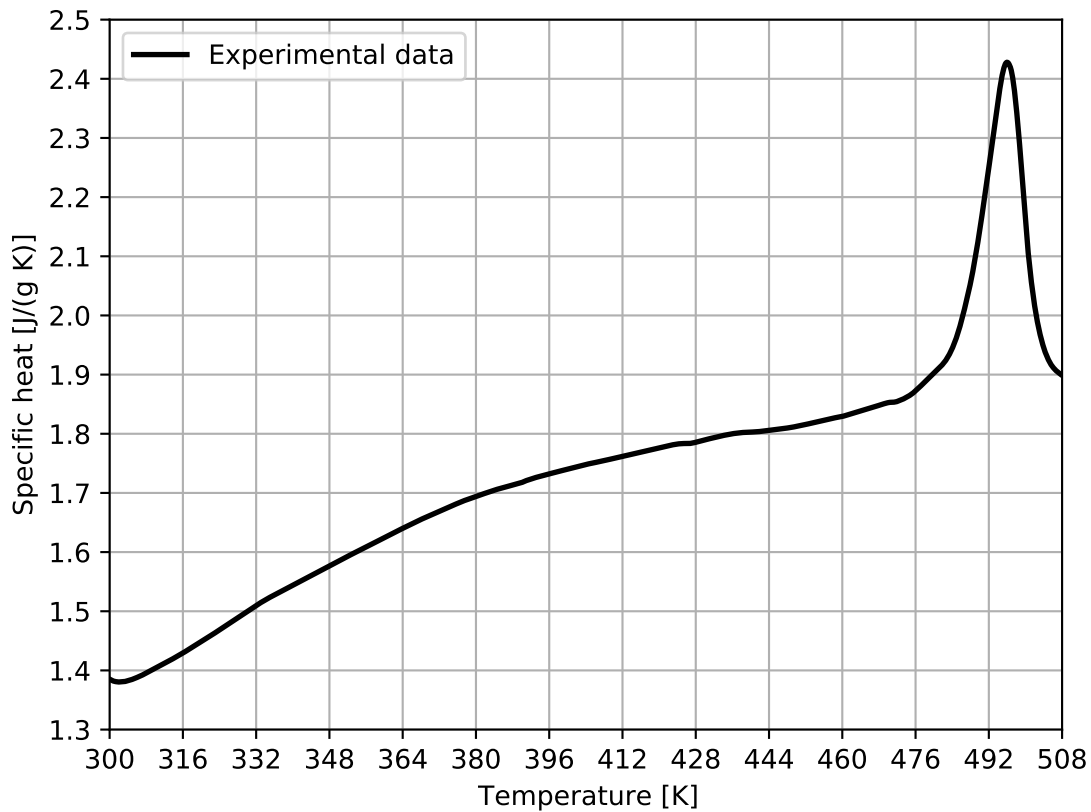

Supplement: Supplementary file 19 [file supplementary]

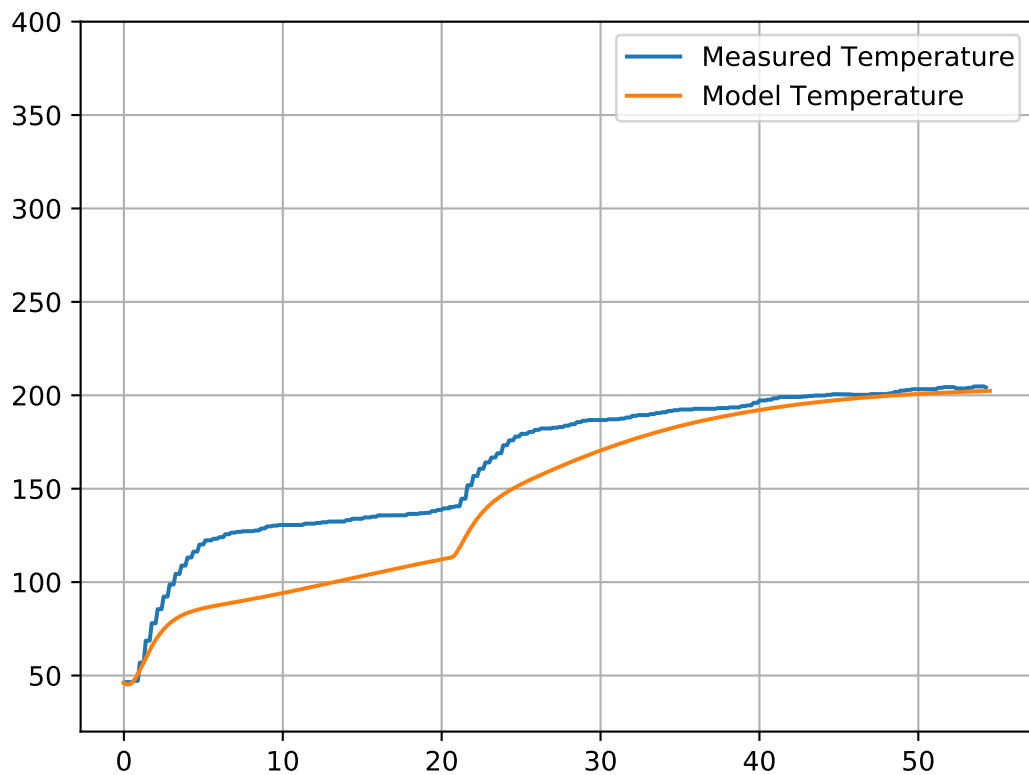

Supplement: Supplementary file 20 [file supplementary]

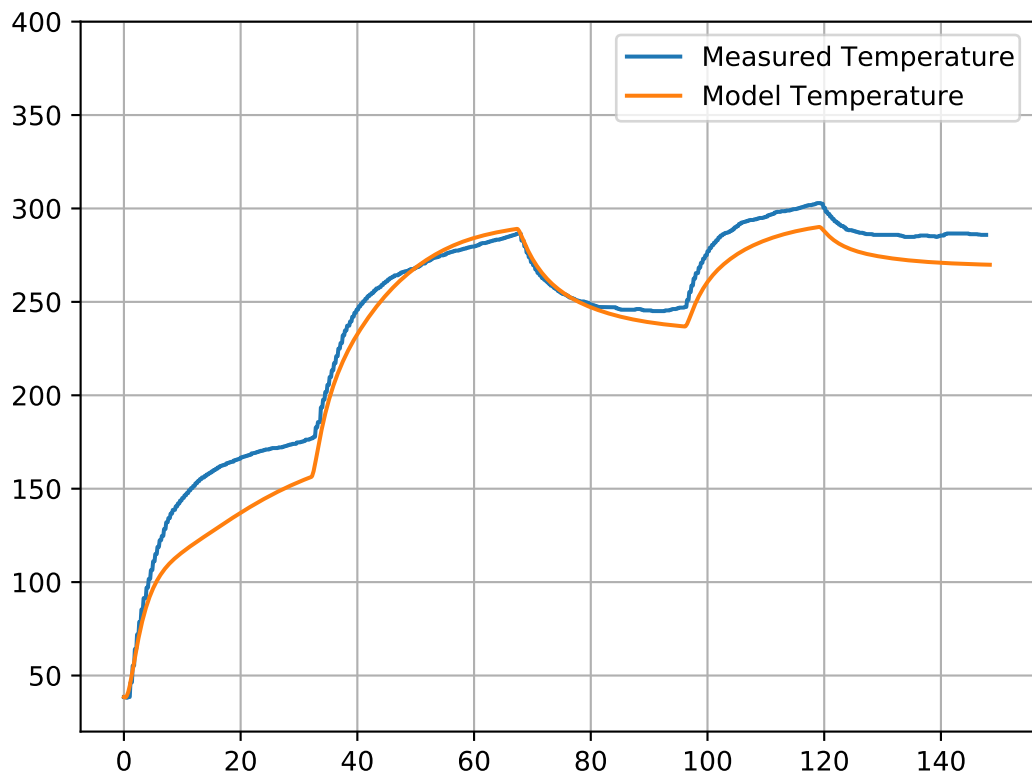

Supplement: Supplementary file 21 [file supplementary]

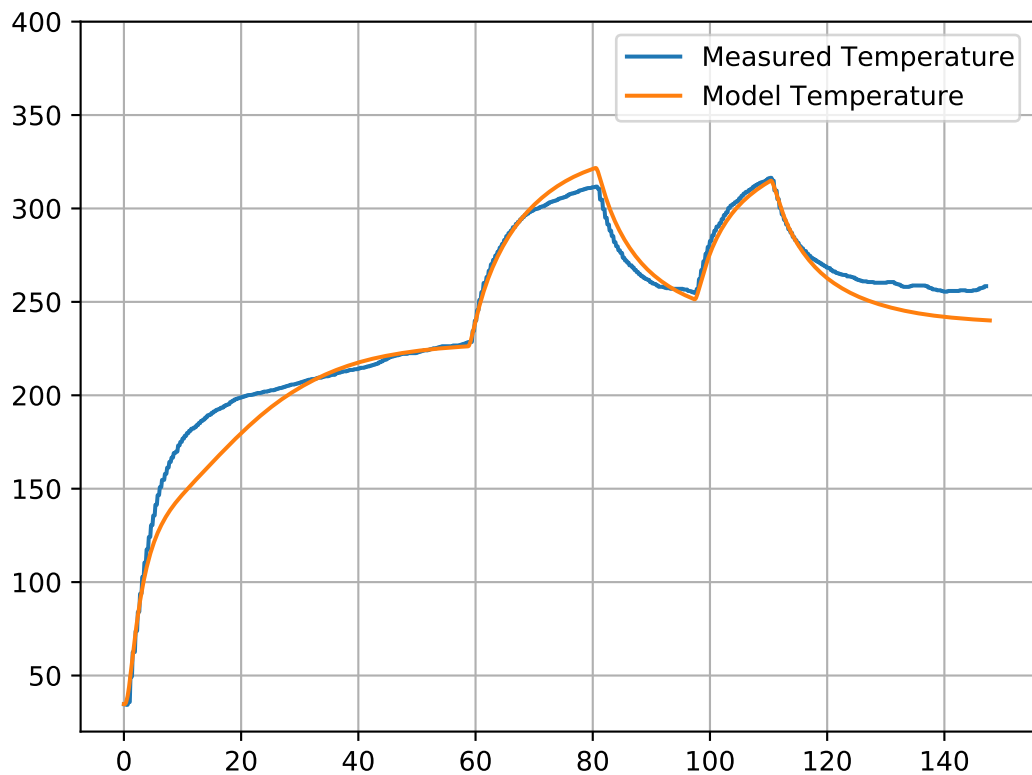

Supplement: Supplementary file 22 [file supplementary]

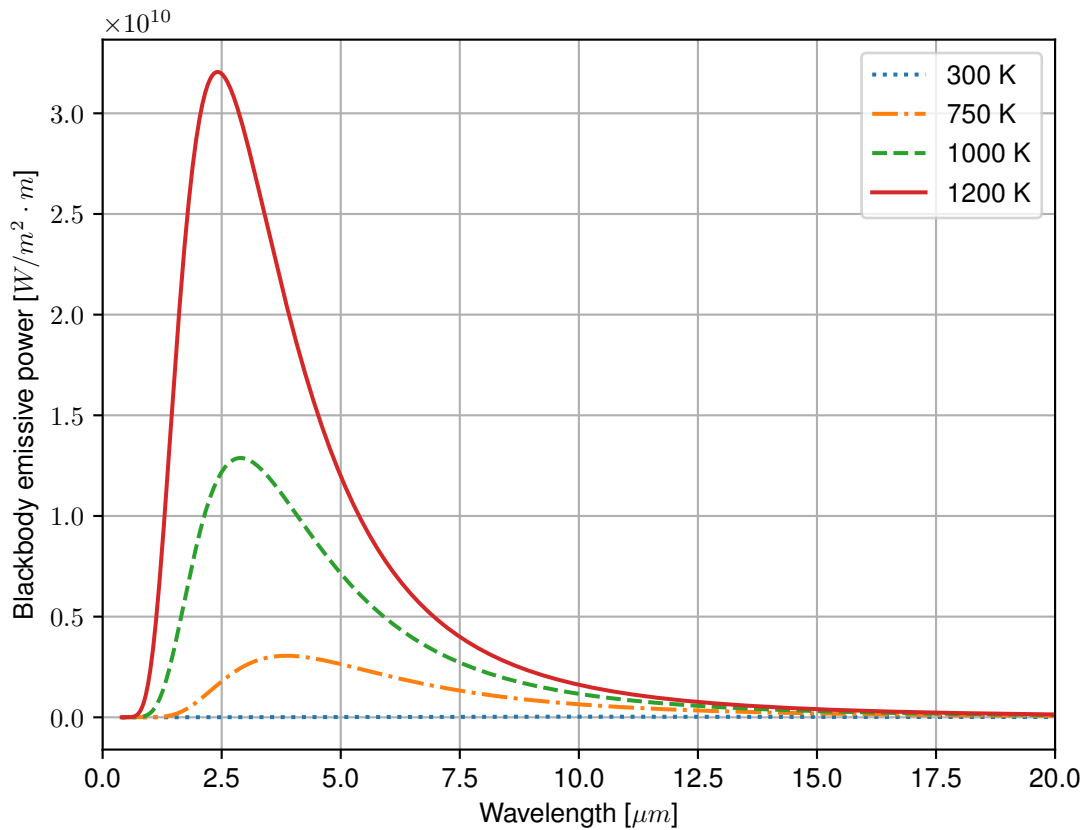

Supplement: Supplementary file 23 [file supplementary]
